# Supplementary material
Source: PubMed Central journal article supplement (PMC4919448)
Supplement: supp_M116.722496_Supplementary_Tables.pdf [file supp_M116.722496_Supplementary_Tables.pdf]

**Supplementary Table 1: Antibodies used for Western blotting**

| <b>Antibody name</b>             | <b>Company</b>      | <b>Catalog No.</b> |
|----------------------------------|---------------------|--------------------|
| p-Akt (S473)                     | Cell Signaling      | 9271               |
| Akt                              | Cell Signaling      | 9272               |
| p-IR                             | Abcam               | ab79053-100        |
| $\alpha$ -tubulin                | Sigma Aldrich       | T6074              |
| Glut-1                           | Millipore           | 07-1401            |
| Glut-4                           | Millipore           | 07-1404            |
| Hexokinase 1                     | Cell Signaling      | 3820S              |
| Hexokinase I (C35C4) rabbit mAb  | Cell Signaling      | 2024S              |
| Hexokinase II (C64G5) rabbit mAb | Cell Signaling      | 2867S              |
| MitoProfile antibody cocktail    | Abcam               | ab110413           |
| PFKFB1                           | Novus Biologicals   | NB100-9239         |
| PFKFB1                           | Abcam               | ab71625            |
| PFKFB2                           | Bethyl Laboratories | a-304-286A-M       |
| PFKFB2                           | Proteintech         | 17838              |
| PFKFB3                           | Proteintech         | 13763-1-AP         |
| GAPDH                            | Cell Signaling      | 3683S              |
| PKM1/2                           | Cell Signaling      | 3106S              |
| LDHA                             | Cell Signaling      | 2012S              |

**Supplementary Table 2.** Antibodies used for flow cytometry.

| <b>Marker</b> | <b>Fluorophore</b> | <b>Company</b>            | <b>Ref/Cat #</b> | <b>Lot #</b> | <b>Dilution</b> |
|---------------|--------------------|---------------------------|------------------|--------------|-----------------|
| CD90          | PE                 | eBioscience               | 12-0903-81       | E01377-1631  | 1:400           |
| CD29          | PE                 | eBioscience               | 12-0291-81       | E01181-1634  | 1:400           |
| CD105         | PE                 | eBioscience               | 12-1051-81       | E01419-1633  | 1:400           |
| CD73          | PE                 | eBioscience               | 12-0731-81       | E01346-1631  | 1:400           |
| CD31          | PE                 | eBioscience               | 12-0311-81       | E01191-1631  | 1:100           |
| CD34          | PE                 | BD<br>Bioscience          | 551387           | 33844        | 1:100           |
| c-kit         | APC Cy7            | eBioscience               | 47-1171-82       | E08461-1637  | 1:100           |
| Sca1          | Per CP Cy5         | eBioscience               | 45-5981-80       | E029641      | 1:100           |
| CD45          | APC Cy7            | BD<br>Bioscience          | 557659           | 04947        | 1:100           |
| SSEA1         | PE                 | eBioscience               | 12-8813-41       | E14612-105   | 1:100           |
| SSEA3         | PE                 | BioLegend                 | 330312           | B169267      | 1:100           |
| SSEA4         | PE                 | BD<br>Bioscience          | 560219           | 5089930      | 1:100           |
| SSEA5         | PE                 | Stem Cell<br>Technologies | 60063PE          | SC05207      | 1:100           |
| FLK1          | APC                | BD<br>Bioscience          | 560070           | 03788        | 1:100           |

**Supplementary Table 3: Primer sequences used for qRT-PCR.**

| <b>Primer name</b> | <b>Sequence</b>                |
|--------------------|--------------------------------|
| Flk-1 Fw           | 5'- ATGTTTCGAGATTACAGATCAC -3' |
| Flk-1 Rev          | 5'- CGCAAAGAGACACATTGAGG -3'   |
| Tnnt2 Fw           | 5'- TGATGACATCCACAGGAAGC -3'   |
| Tnnt2 Rev          | 5'- GACGCTTTTCGATCCTGTCT -3'   |
| Cyp7b1 Fw          | 5'- CTGAAAGAGCACATCATCT-3'     |
| Cyp7b1 Rev         | 5'- TTGACCTGTTGACTGCAGG -3'    |
| Col1a1 Fw          | 5'- GAGCGGAGAGTACTGGATCG -3'   |
| Col1a1 Rev         | 5'- GTTCGGGCTGATGTACCAGT -3'   |
| Col3a1 Fw          | 5'- TTCTGCTGTTGCTGGTGAAC -3'   |
| Col3a1 Rev         | 5'- TGGCTTGAATGAAGGTACCAA -3'  |
| TGFb-1 Fw          | 5'- AGCTGCGCTTGCAGAGATTAA -3'  |
| TGFb-1 Rev         | 5'- AGCAGCCGGTTACCAAGGTA -3'   |
| Acta 2 Fw          | 5'- CCCAGACATCAGGGAGTAATG -3'  |
| Acta 2 Rev         | 5'- CTTTTCCATGTCGTCGCCAGT -3'  |
| Bhlhe22 Fw         | 5'- GACGACCTCTTCCTGCACA -3'    |
| Bhlhe22 Rev        | 5'- GATCAGCGGGCTCGAAAC-3'      |
| Lox Fw             | 5'- GAGCTGGGATCCTGACTCAC -3'   |
| Lox Rev            | 5'- GTGTGCTTTCAGGCAGATGA -3'   |
